# Supplementary figures and images for: Intestinal Barrier Permeability in Obese Individuals with or without Metabolic Syndrome: A Systematic Review
Source: MDPI journal article supplement (doi:10.3390/nu14173649), 2022-09-03

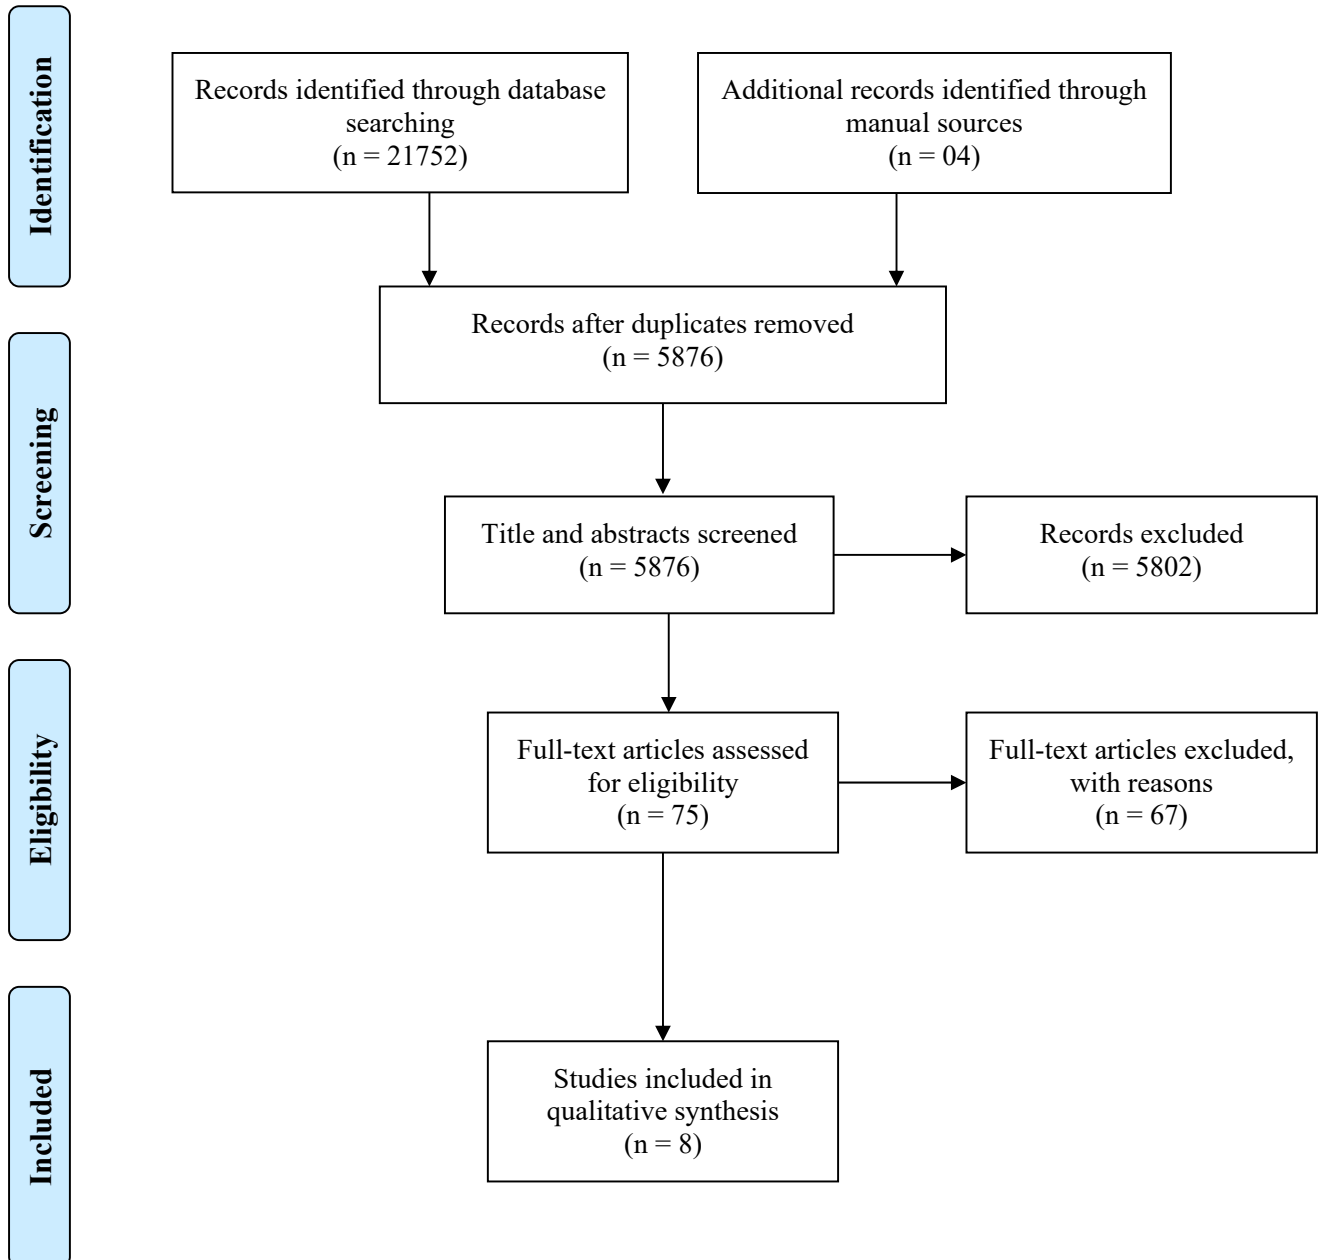

Supplement: s1 [file s1]
